# Supplementary material for: Methylation of a panel of genes in peripheral blood leukocytes is associated with colorectal cancer
Source: PubMed Central journal article supplement (PMC4958953; doi:10.1038/srep29922), 2016-07-25
Supplement: srep29922-s1.pdf [file srep29922-s1.pdf]

# **Methylation of a panel of genes in peripheral blood leukocytes is associated with colorectal cancer**

Xiang Luo<sup>1</sup>, Rong Huang<sup>1</sup>, Hongru Sun<sup>1</sup>, Yupeng Liu<sup>1</sup>, Haoran Bi<sup>1</sup>, Jing Li<sup>1</sup>, Hongyuan Yu<sup>1</sup>, Jiamei Sun<sup>1</sup>, Shangqun Lin<sup>2</sup>, Binbin Cui<sup>2</sup>, Yashuang Zhao<sup>1</sup>



|                              |                |            |            |      |           |      |      |            |       |      |           |      |
|------------------------------|----------------|------------|------------|------|-----------|------|------|------------|-------|------|-----------|------|
| Poultry                      | ≥250g /Week    | 45 (11.3)  | 59 (12.6)  | 0.88 | 0.58-1.34 | 0.56 | 0.94 | 0.61-1.43  | 0.76  | 0.94 | 0.61-1.43 | 0.76 |
|                              | <2 Times/Month | 182 (44.1) | 244 (48.3) | 1.00 |           |      |      |            |       |      |           |      |
| Fish                         | ≥2 Times/Month | 231 (55.9) | 261 (51.7) | 1.17 | 0.90-1.52 | 0.24 | 1.11 | 0.84-1.45  | 0.47  | 1.11 | 0.84-1.45 | 0.47 |
|                              | <1 Times/Month | 310 (82.4) | 405 (86.5) | 1.00 |           |      |      |            |       |      |           |      |
| Seafood                      | ≥1 Times/Month | 66 (17.6)  | 63 (13.5)  | 1.40 | 0.97-2.02 | 0.07 | 1.47 | 0.997-2.17 | 0.052 | 1.47 | 0.99-2.17 | 0.05 |
| Stewed fish with brown sauce | <1 Times/Week  | 282 (68.3) | 382 (77.6) | 1.00 |           |      |      |            |       |      |           |      |
|                              | ≥1 Times/Week  | 131 (31.7) | 110 (22.4) | 1.59 | 1.18-2.13 | 0.00 | 1.65 | 1.21-2.24  | 0.00  | 1.65 | 1.21-2.24 | 0.00 |
|                              | <3 Times/Week  | 268 (64.9) | 226 (58.2) | 1.00 |           |      |      |            |       |      |           |      |
| Milk                         | ≥3 Times/Week  | 145 (35.1) | 162 (41.8) | 0.80 | 0.59-1.09 | 0.15 | 0.66 | 0.47-0.93  | 0.02  | 0.66 | 0.47-0.93 | 0.02 |
|                              | No             | 44 (10.7)  | 48 (9.6)   | 1.00 |           |      |      |            |       |      |           |      |
| Egg                          | Yes            | 369 (89.3) | 454 (90.4) | 0.89 | 0.58-1.36 | 0.58 | 0.80 | 0.52-1.25  | 0.34  | 0.80 | 0.52-1.25 | 0.34 |
|                              | No             | 399 (96.8) | 478 (94.7) | 1.00 |           |      |      |            |       |      |           |      |
| Coffee                       | Yes            | 13 (3.2)   | 27 (5.3)   | 0.57 | 0.29-1.12 | 0.10 | 0.51 | 0.25-1.05  | 0.07  | 0.51 | 0.25-1.05 | 0.07 |
|                              | No             | 297 (71.7) | 378 (74.9) | 1.00 |           |      |      |            |       |      |           |      |
| Tea                          | Yes            | 117 (28.3) | 127 (25.1) | 1.19 | 0.89-1.59 | 0.25 | 1.14 | 0.83-1.56  | 0.42  | 1.13 | 0.83-1.54 | 0.45 |
|                              | No             | 395 (96.8) | 484 (95.8) | 1.00 |           |      |      |            |       |      |           |      |
| Sodas                        | Yes            | 13 (3.2)   | 21 (4.2)   | 1.31 | 0.65-2.64 | 0.45 | 1.20 | 0.58-2.47  | 0.63  | 1.20 | 0.58-2.47 | 0.63 |
|                              | <1 Times/Month | 293 (70.6) | 403 (80.0) | 1.00 |           |      |      |            |       |      |           |      |
| Fried food                   | ≥1 Times/Month | 122 (29.4) | 101 (20.0) | 1.68 | 1.24-2.28 | 0.00 | 1.68 | 1.23-2.30  | 0.00  | 1.68 | 1.23-2.90 | 0.00 |



|          |     |           |            |      |           |      |      |           |      |      |           |      |
|----------|-----|-----------|------------|------|-----------|------|------|-----------|------|------|-----------|------|
| Drinking | Yes | 99 (42.5) | 176 (40.9) | 0.98 | 0.65-1.48 | 0.92 | 0.96 | 0.57-1.59 | 0.85 | 0.96 | 0.62-1.46 | 0.82 |
|----------|-----|-----------|------------|------|-----------|------|------|-----------|------|------|-----------|------|

---

<sup>a</sup> Adjusted for age, BMI, occupation, family history of cancer and smoking

<sup>b</sup> Adjusted for age, BMI, occupation, family history of cancer

**Table S2 Clinicopathologic characteristics of CRC patients**

| Clinicopathologic characteristics | Patients (n=256) (%) |
|-----------------------------------|----------------------|
| Age                               |                      |
| < 50                              | 52 (20.4)            |
| 50-59                             | 80 (31.4)            |
| 60-69                             | 72 (28.2)            |
| ≥70                               | 51 (20.0)            |
| Gender                            |                      |
| Male                              | 145 (56.9)           |
| Female                            | 110 (43.1)           |
| Dukes stage                       |                      |
| A                                 | 30 (11.8)            |
| B                                 | 111 (43.7)           |
| C                                 | 95 (37.4)            |
| D                                 | 18 (7.1)             |
| Pathological grade                |                      |
| Low                               | 40 (15.7)            |
| Medium                            | 201 (78.8)           |
| High                              | 2 (0.8)              |
| Unknown                           | 12 (4.7)             |
| Tumor location                    |                      |
| Colon                             | 81 (32.1)            |
| Rectum                            | 171 (67.9)           |
| Metastasis status                 |                      |
| M0                                | 114 (44.7)           |

|                                                                  |            |
|------------------------------------------------------------------|------------|
| M1                                                               | 141 (55.3) |
| Multiple polyps                                                  |            |
| No                                                               | 167 (70.2) |
| Yes                                                              | 71 (29.8)  |
| CEA (carcino-embryonic antigen) level before operation (ng/ml)   |            |
| <5                                                               | 111 (43.5) |
| ≥5                                                               | 144 (56.5) |
| CA19-9(carbohydrate antigen 19-9) level before operation (μg/ml) |            |
| <37                                                              | 183 (73.2) |
| ≥37                                                              | 67 (26.8)  |
| Histologic type                                                  |            |
| Adenocarcinoma                                                   | 245 (99.2) |
| Other types                                                      | 2 (0.8)    |
| Pathogenic type                                                  |            |
| Protrude type                                                    | 159 (64.4) |
| Ulcerative or infiltrating type                                  | 86 (34.8)  |
| Other type                                                       | 2 (0.8)    |
| Intestinal anastomosis                                           |            |
| No                                                               | 63 (26.6)  |
| Yes                                                              | 174 (73.4) |

---

**Table S3 Cox regression analysis with association between clinicopathologic factors and CRC prognosis**

|                                                   | B      | SE    | Wald   | df | P value | HR    | 95% CI       |
|---------------------------------------------------|--------|-------|--------|----|---------|-------|--------------|
| Dukes (A)                                         |        |       | 18.038 | 3  | 0.000   |       |              |
| Dukes (B)                                         | 0.749  | 0.509 | 2.166  | 1  | 0.141   | 2.116 | 0.780-5.740  |
| Dukes (C)                                         | 0.546  | 0.947 | 0.333  | 1  | 0.564   | 1.727 | 0.270-11.052 |
| Dukes (D)                                         | 1.937  | 1.024 | 3.576  | 1  | 0.059   | 6.935 | 0.932-51.619 |
| Multiple polyps                                   | 0.161  | 0.249 | 0.417  | 1  | 0.518   | 1.174 | 0.721-1.912  |
| Metastasis status                                 | -0.912 | 0.792 | 1.328  | 1  | 0.249   | 0.402 | 0.085-1.895  |
| Pathological grade (Low)                          |        |       | 3.664  | 3  | 0.300   |       |              |
| Pathological grade (Medium)                       | -0.418 | 0.289 | 2.092  | 1  | 0.148   | 0.658 | 0.373-1.160  |
| Pathological grade (High)                         | -0.644 | 0.774 | 0.693  | 1  | 0.405   | 0.525 | 0.115-2.393  |
| Pathological grade (Unkown)                       | -0.966 | 0.595 | 2.634  | 1  | 0.105   | 0.381 | 0.118-1.222  |
| Preoperative CEA level                            | 0.088  | 0.271 | 0.106  | 1  | 0.745   | 1.092 | 0.642-1.858  |
| Pathogenic type (Protrude type)                   |        |       | 0.354  | 2  | 0.838   |       |              |
| Pathogenic type (Ulcerative or infiltrating type) | -0.008 | 0.295 | 0.001  | 1  | 0.978   | 0.992 | 0.556-1.768  |
| Pathogenic type (Other type)                      | 0.318  | 0.545 | 0.340  | 1  | 0.560   | 1.374 | 0.472-4.000  |
| Preoperative CA19-9 level                         | 1.459  | 0.261 | 31.179 | 1  | 0.000   | 4.300 | 2.577-7.176  |
| Intestinal anastomosis                            | 0.974  | 0.249 | 15.263 | 1  | 0.000   | 2.648 | 1.625-4.315  |
| Intraoperative chemotherapy                       | -0.175 | 0.237 | 0.548  | 1  | 0.459   | 0.839 | 0.528-1.335  |
| Postoperative chemotherapy                        | 0.221  | 0.240 | 0.852  | 1  | 0.356   | 1.248 | 0.780-1.997  |



**Table S4 Associations between methylation of individual genes, MCSM and prognosis of CRC**

|         | Gene          | Patients<br>(n=256) (%) | 3-year<br>Survival (%) | 5-year<br>Survival (%) | OS<br>(months) | HR<br>(95% CI)   | <i>P</i> value | HR <sup>a</sup><br>(95% CI) | <i>P</i> value |
|---------|---------------|-------------------------|------------------------|------------------------|----------------|------------------|----------------|-----------------------------|----------------|
| IRF4    | Unmethylation | 228 (89.4)              | 67                     | 58                     | 73.63±2.70     | 1.00             |                | 1.00                        |                |
|         | Methylation   | 27 (10.6)               | 67                     | 63                     | 70.25±7.89     | 0.93 (0.50-1.73) | 0.82           | 0.78 (0.41-1.49)            | 0.45           |
| FOXE-1  | Unmethylation | 167 (65.5)              | 66                     | 57                     | 72.28±3.17     | 1.00             |                | 1.00                        |                |
|         | Methylation   | 88 (34.5)               | 70                     | 62                     | 76.01±4.56     | 0.85 (0.57-1.27) | 0.43           | 1.01 (0.66-1.54)            | 0.98           |
| AOX-1   | Unmethylation | 116 (45.8)              | 64                     | 58                     | 72.75±3.84     | 1.00             |                | 1.00                        |                |
|         | Methylation   | 137 (54.2)              | 69                     | 60                     | 74.23±3.48     | 0.97 (0.67-1.41) | 0.88           | 1.18 (0.79-1.77)            | 0.42           |
| ADAMTS9 | Unmethylation | 154 (60.4)              | 66                     | 58                     | 73.04±3.29     | 1.00             |                | 1.00                        |                |
|         | Methylation   | 101 (39.6)              | 69                     | 60                     | 74.81±4.07     | 0.92 (0.63-1.35) | 0.68           | 1.06 (0.70-1.60)            | 0.78           |
| RERG    | Unmethylation | 142 (56.1)              | 67                     | 58                     | 73.35±3.38     | 1.00             |                | 1.00                        |                |
|         | Methylation   | 111 (43.9)              | 67                     | 60                     | 74.08±3.97     | 0.94 (0.64-1.37) | 0.74           | 0.89 (0.59-1.33)            | 0.57           |
| RARB2   | Unmethylation | 187 (73.3)              | 67                     | 57                     | 73.13±2.96     | 1.00             |                | 1.00                        |                |
|         | Methylation   | 68 (26.7)               | 68                     | 65                     | 69.53±5.14     | 0.90 (0.58-1.40) | 0.63           | 0.91 (0.58-1.44)            | 0.69           |
| MCSM    | Non-MCSM      | 60 (27.9)               | 58                     | 50                     | 65.45±5.15     | 1.00             |                | 1.00                        |                |
|         | MCSM-L        | 65 (25.9)               | 73                     | 63                     | 78.03±4.87     | 0.68 (0.40-1.13) | 0.14           | 1.04 (0.56-1.91)            | 0.91           |
|         | MCSM-H        | 126 (50.2)              | 68                     | 61                     | 74.25±3.71     | 0.74 (0.47-1.15) | 0.18           | 1.04 (0.65-1.68)            | 0.87           |

|      |            |    |    |            |                  |      |                  |      |
|------|------------|----|----|------------|------------------|------|------------------|------|
| MCSM | 191 (76.1) | 70 | 61 | 75.79±2.94 | 0.72 (0.47-1.09) | 0.12 | 1.04 (0.66-1.65) | 0.87 |
|------|------------|----|----|------------|------------------|------|------------------|------|

<sup>a</sup> Adjusted for Dukes staging, preoperative CA19-9 level and intestinal anastomosis

**Table S5 Effects of combination and interaction between cereals intake and methylation of genes, MCSM on the risk of CRC**

|                | Cereals            |                                       |                   |                         |          |
|----------------|--------------------|---------------------------------------|-------------------|-------------------------|----------|
|                | <100g /Week        | ≥100g /Week                           |                   | Interaction             |          |
|                |                    | OR <sub>eg</sub> <sup>1</sup> (95%CI) |                   | OR <sub>i</sub> (95%CI) | <i>P</i> |
| <i>FOXE-1</i>  |                    |                                       |                   |                         |          |
| Unmethylation  | 1.00               |                                       | 0.48 (0.42-0.56)  |                         |          |
| Methylation    | 1.26 (1.05-1.50)   |                                       | 0.79 (0.64-0.98)  | 1.31 (0.68-2.48)        | 0.42     |
| <i>IRF4</i>    |                    |                                       |                   |                         |          |
| Unmethylation  | 1.00               |                                       | 0.55 (0.48-0.63)  |                         |          |
| Methylation    | 15.81 (8.27-30.23) |                                       | 9.41 (3.65-24.23) | 1.08 (0.81-14.35)       | 0.96     |
| <i>ADAMTS9</i> |                    |                                       |                   |                         |          |
| Unmethylation  | 1.00               |                                       | 0.50 (0.43-0.58)  |                         |          |

|               |                  |                  |                  |       |
|---------------|------------------|------------------|------------------|-------|
| Methylation   | 1.67 (1.41-1.97) | 1.08 (0.87-1.33) | 1.30 (0.69-2.44) | 0.42  |
| <i>AOXI</i>   |                  |                  |                  |       |
| Unmethylation | 1.00             | 0.41 (0.34-0.49) |                  |       |
| Methylation   | 1.38 (1.19-1.61) | 1.03 (0.85-1.25) | 1.82 (1.01-3.26) | 0.045 |
| <i>RERG</i>   |                  |                  |                  |       |
| Unmethylation | 1.00             | 0.49 (0.42-0.58) |                  |       |
| Methylation   | 1.76 (1.50-2.06) | 1.28 (1.04-1.58) | 1.50 (0.80-2.78) | 0.20  |
| <i>RARB2</i>  |                  |                  |                  |       |
| Unmethylation | 1.00             | 0.55 (0.47-0.63) |                  |       |
| Methylation   | 0.94 (0.80-1.12) | 0.50 (0.39-0.62) | 0.96 (0.49-1.88) | 0.91  |
| MCSM          |                  |                  |                  |       |
| Unmethylation | 1.00             | 0.37 (0.29-0.48) |                  |       |
| Methylation   | 1.26 (1.07-1.48) | 0.80 (0.66-0.97) | 1.72 (0.89-3.33) | 0.11  |

<sup>a</sup> Adjusted for age, BMI, occupation and family history of cancer

**Table S6 Effects of combination and interaction between vegetable intake and methylation of genes, MCSM on the risk of CRC**

|                | Vegetable                             |                    | Interaction             | <i>P</i> |
|----------------|---------------------------------------|--------------------|-------------------------|----------|
|                | <100g /Day                            | ≥100g /Day         |                         |          |
|                | OR <sub>eg</sub> <sup>1</sup> (95%CI) |                    | OR <sub>i</sub> (95%CI) |          |
| <i>FOXE-1</i>  |                                       |                    |                         |          |
| Unmethylation  | 1.00                                  | 0.64 (0.49-0.84)   |                         |          |
| Methylation    | 1.35 (0.84-2.18)                      | 0.86 (0.65-1.14)   | 0.99 (0.32-3.02)        | 0.98     |
| <i>IRF4</i>    |                                       |                    |                         |          |
| Unmethylation  | 1.00                                  | 0.62 (0.49-0.78)   |                         |          |
| Methylation    | -                                     | 10.26 (5.79-18.19) | -                       | -        |
| <i>ADAMTS9</i> |                                       |                    |                         |          |
| Unmethylation  | 1.00                                  | 0.78 (0.58-1.03)   |                         |          |
| Methylation    | 2.37 (1.53-3.68)                      | 1.36 (1.01-1.84)   | 0.75 (0.26-2.10)        | 0.58     |
| <i>AOXI</i>    |                                       |                    |                         |          |
| Unmethylation  | 1.00                                  | 0.90 (0.67-1.21)   |                         |          |
| Methylation    | 3.29 (2.11-5.14)                      | 1.45 (1.07-1.96)   | 0.49 (0.17-1.39)        | 0.18     |
| <i>RERG</i>    |                                       |                    |                         |          |
| Unmethylation  | 1.00                                  | 0.91 (0.69-1.22)   |                         |          |
| Methylation    | 4.39 (2.74-7.02)                      | 1.76 (1.31-2.37)   | 0.44 (0.15-1.33)        | 0.15     |
| <i>RARB2</i>   |                                       |                    |                         |          |
| Unmethylation  | 1.00                                  | 0.71 (0.55-0.91)   |                         |          |
| Methylation    | 1.56 (0.91-2.68)                      | 0.66 (0.51-0.86)   | 0.60 (0.17-2.14)        | 0.43     |
| <b>MCSM</b>    |                                       |                    |                         |          |
| Unmethylation  | 1.00                                  | 1.35 (0.89-2.06)   |                         |          |
| Methylation    | 3.75 (2.32-6.05)                      | 1.86 (1.23-2.81)   | 0.37 (0.12-1.14)        | 0.08     |

<sup>a</sup> Adjusted for age, BMI, occupation and family history of cancer

**Table S7 Effects of combination and interaction between fat intake and methylation of genes, MCSM on the risk of CRC**

|                | Fat                                   |                     | Interaction             | <i>P</i> |
|----------------|---------------------------------------|---------------------|-------------------------|----------|
|                | No                                    | Yes                 |                         |          |
|                | OR <sub>eg</sub> <sup>1</sup> (95%CI) |                     | OR <sub>i</sub> (95%CI) |          |
| <i>FOXE-1</i>  |                                       |                     |                         |          |
| Unmethylation  | 1.00                                  | 1.35 (1.18-1.55)    |                         |          |
| Methylation    | 1.07 (0.88-1.31)                      | 2.22 (1.82-2.70)    | 1.54 (0.82-2.92)        | 0.19     |
| <i>IRF4</i>    |                                       |                     |                         |          |
| Unmethylation  | 1.00                                  | 1.50 (1.32-1.70)    |                         |          |
| Methylation    | 21.69 (8.66-54.31)                    | 20.64 (10.43-38.59) | 0.62 (0.05-7.75)        | 0.71     |
| <i>ADAMTS9</i> |                                       |                     |                         |          |
| Unmethylation  | 1.00                                  | 1.60 (1.39-1.85)    |                         |          |
| Methylation    | 1.83 (1.52-2.21)                      | 2.95 (2.44-3.58)    | 1.01 (0.55-1.85)        | 0.99     |
| <i>AOXI</i>    |                                       |                     |                         |          |
| Unmethylation  | 1.00                                  | 1.67 (1.42-1.96)    |                         |          |
| Methylation    | 1.84 (1.55-2.19)                      | 2.53 (2.13-3.04)    | 0.82 (0.48-1.43)        | 0.49     |
| <i>RERG</i>    |                                       |                     |                         |          |
| Unmethylation  | 1.00                                  | 1.68 (1.45-1.96)    |                         |          |
| Methylation    | 2.22 (1.86-2.66)                      | 3.43 (2.83-4.15)    | 0.92 (0.51-1.64)        | 0.77     |
| <i>RARB2</i>   |                                       |                     |                         |          |
| Unmethylation  | 1.00                                  | 1.65 (1.43-1.90)    |                         |          |
| Methylation    | 1.07 (0.89-1.30)                      | 1.43 (1.17-1.75)    | 0.81 (0.43-1.51)        | 0.51     |
| <b>MCSM</b>    |                                       |                     |                         |          |
| Unmethylation  | 1.00                                  | 2.00 (1.59-2.51)    |                         |          |
| Methylation    | 1.74 (1.44-2.10)                      | 2.44 (2.03-2.95)    | 0.70 (0.38-1.29)        | 0.26     |

<sup>a</sup> Adjusted for age, BMI, occupation and family history of cancer

**Table S8 Effects of combination and interaction between beef and mutton intake and methylation of genes, MCSM on the risk of CRC**

|                | Beef and Mutton                       |                  |                         | <i>P</i> |
|----------------|---------------------------------------|------------------|-------------------------|----------|
|                | <250g /Week                           | ≥250g /Week      | Interaction             |          |
|                | OR <sub>eg</sub> <sup>1</sup> (95%CI) |                  | OR <sub>i</sub> (95%CI) |          |
| <i>FOXE-1</i>  |                                       |                  |                         |          |
| Unmethylation  | 1.00                                  | 0.79 (0.66-0.96) |                         |          |
| Methylation    | 1.40 (1.20-1.63)                      | 0.90 (0.66-1.23) | 0.81 (0.34-1.93)        | 0.64     |
| <i>IRF4</i>    |                                       |                  |                         |          |
| Unmethylation  | 1.00                                  | 0.73 (0.61-0.86) |                         |          |
| Methylation    | 14.09 (8.24-24.10)                    | -                | -                       | -        |
| <i>ADAMTS9</i> |                                       |                  |                         |          |
| Unmethylation  | 1.00                                  | 0.86 (0.70-1.04) |                         |          |
| Methylation    | 2.07 (1.78-2.40)                      | 0.99 (0.76-1.31) | 0.56 (0.26-1.24)        | 0.15     |
| <i>AOXI</i>    |                                       |                  |                         |          |
| Unmethylation  | 1.00                                  | 0.70 (0.56-0.88) |                         |          |
| Methylation    | 1.68 (1.47-1.93)                      | 1.35 (1.05-1.72) | 1.14 (0.53-2.43)        | 0.74     |
| <i>RERG</i>    |                                       |                  |                         |          |
| Unmethylation  | 1.00                                  | 0.78 (0.64-0.96) |                         |          |
| Methylation    | 2.19 (1.90-2.53)                      | 1.31 (1.01-1.71) | 0.77 (0.36-1.65)        | 0.50     |
| <i>RARB2</i>   |                                       |                  |                         |          |
| Unmethylation  | 1.00                                  | 0.88 (0.73-1.06) |                         |          |
| Methylation    | 1.08 (0.93-1.25)                      | 0.40 (0.28-0.57) | 0.42 (0.16-1.08)        | 0.07     |
| MCSM           |                                       |                  |                         |          |
| Unmethylation  | 1.00                                  | 1.02 (0.74-1.41) |                         |          |
| Methylation    | 1.64 (1.42-1.90)                      | 1.03 (0.84-1.29) | 0.62 (0.27-1.42)        | 0.26     |

<sup>a</sup> Adjusted for age, BMI, occupation and family history of cancer

**Table S9 Effects of combination and interaction between pork intake and methylation of genes, MCSM on the risk of CRC**

|                | Pork                                  |                    | Interaction             | <i>P</i> |
|----------------|---------------------------------------|--------------------|-------------------------|----------|
|                | <250g /Week                           | ≥250g /Week        |                         |          |
|                | OR <sub>eg</sub> <sup>1</sup> (95%CI) |                    | OR <sub>i</sub> (95%CI) |          |
| <i>FOXE-1</i>  |                                       |                    |                         |          |
| Unmethylation  | 1.00                                  | 1.33 (1.16-1.53)   |                         |          |
| Methylation    | 1.07 (0.89-1.30)                      | 2.43 (1.97-2.99)   | 1.70 (0.90-3.22)        | 0.10     |
| <i>IRF4</i>    |                                       |                    |                         |          |
| Unmethylation  | 1.00                                  | 1.48 (1.31-1.68)   |                         |          |
| Methylation    | 28.98 (11.69-71.82)                   | 16.10 (8.31-31.17) | 0.37 (0.03-4.61)        | 0.44     |
| <i>ADAMTS9</i> |                                       |                    |                         |          |
| Unmethylation  | 1.00                                  | 1.64 (1.42-1.90)   |                         |          |
| Methylation    | 2.14 (1.78-2.58)                      | 2.44 (2.03-2.94)   | 0.70 (0.38-1.26)        | 0.23     |
| <i>AOXI</i>    |                                       |                    |                         |          |
| Unmethylation  | 1.00                                  | 1.70 (1.44-1.99)   |                         |          |
| Methylation    | 1.92 (1.62-2.27)                      | 2.57 (2.15-3.08)   | 0.79 (0.45-1.39)        | 0.42     |
| <i>RERG</i>    |                                       |                    |                         |          |
| Unmethylation  | 1.00                                  | 1.56 (1.34-1.81)   |                         |          |
| Methylation    | 2.21 (1.85-2.63)                      | 2.96 (2.46-3.56)   | 0.86 (0.48-1.53)        | 0.61     |
| <i>RARB2</i>   |                                       |                    |                         |          |
| Unmethylation  | 1.00                                  | 1.45 (1.26-1.67)   |                         |          |
| Methylation    | 0.91 (0.76-1.11)                      | 1.48 (1.21-1.81)   | 1.12 (0.58-2.12)        | 0.74     |
| MCSM           |                                       |                    |                         |          |
| Unmethylation  | 1.00                                  | 1.96 (1.56-2.46)   |                         |          |
| Methylation    | 1.77 (1.47-2.13)                      | 2.42 (2.00-2.93)   | 0.70 (0.38-1.28)        | 0.25     |

<sup>a</sup> Adjusted for age, BMI, occupation and family history of cancer

**Table S10 Effects of combination and interaction between stewed fish with brown sauce intake and methylation of genes, MCSM on the risk of CRC**

|                | Stewed fish with brown sauce          |                    |                         | <i>P</i> |
|----------------|---------------------------------------|--------------------|-------------------------|----------|
|                | <1 Times/Week                         | ≥1 Times/Week      | Interaction             |          |
|                | OR <sub>eg</sub> <sup>1</sup> (95%CI) |                    | OR <sub>i</sub> (95%CI) |          |
| <i>FOXE-1</i>  |                                       |                    |                         |          |
| Unmethylation  | 1.00                                  | 1.76 (1.50-2.07)   |                         |          |
| Methylation    | 1.44 (1.22-1.69)                      | 1.89 (1.50-2.40)   | 0.75 (0.37-1.50)        | 0.42     |
| <i>IRF4</i>    |                                       |                    |                         |          |
| Unmethylation  | 1.00                                  | 1.67 (1.45-1.92)   |                         |          |
| Methylation    | 22.67 (11.46-44.83)                   | 14.97 (6.38-35.14) | 0.40 (0.02-7.18)        | 0.53     |
| <i>ADAMTS9</i> |                                       |                    |                         |          |
| Unmethylation  | 1.00                                  | 2.06 (1.75-2.42)   |                         |          |
| Methylation    | 2.25 (1.92-2.63)                      | 2.31 (1.82-2.92)   | 0.50 (0.25-0.99)        | 0.046    |
| <i>AOXI</i>    |                                       |                    |                         |          |
| Unmethylation  | 1.00                                  | 1.86 (1.55-2.23)   |                         |          |
| Methylation    | 1.80 (1.55-2.08)                      | 2.84 (2.31-3.48)   | 0.85 (0.45-1.58)        | 0.60     |
| <i>RERG</i>    |                                       |                    |                         |          |
| Unmethylation  | 1.00                                  | 1.58 (1.33-1.87)   |                         |          |
| Methylation    | 2.03 (1.75-2.36)                      | 3.31 (2.66-4.12)   | 1.03 (0.54-1.97)        | 0.92     |
| <i>RARB2</i>   |                                       |                    |                         |          |
| Unmethylation  | 1.00                                  | 1.59 (1.36-1.86)   |                         |          |
| Methylation    | 0.95 (0.80-1.11)                      | 1.65 (1.28-2.13)   | 1.10 (0.54-2.24)        | 0.79     |
| <b>MCSM</b>    |                                       |                    |                         |          |
| Unmethylation  | 1.00                                  | 2.32 (1.80-2.99)   |                         |          |
| Methylation    | 1.70 (1.45-1.99)                      | 2.59 (2.13-3.16)   | 0.66 (0.33-1.31)        | 0.23     |

<sup>a</sup> Adjusted for age, BMI, occupation and family history of cancer



**Table S11 Effects of combination and interaction between fried food intake and methylation of genes, MCSM on the risk of CRC**

|                | Fried food                            |                         | Interaction      | <i>P</i> |
|----------------|---------------------------------------|-------------------------|------------------|----------|
|                | <1 Times/Month                        | ≥1 Times/Month          |                  |          |
|                | OR <sub>eg</sub> <sup>1</sup> (95%CI) | OR <sub>i</sub> (95%CI) |                  |          |
| <i>FOXE-1</i>  |                                       |                         |                  |          |
| Unmethylation  | 1.00                                  | 1.59 (1.35-1.87)        |                  |          |
| Methylation    | 1.26 (1.08-1.48)                      | 2.81 (2.14-3.70)        | 1.40 (0.65-3.02) | 0.39     |
| <i>IRF4</i>    |                                       |                         |                  |          |
| Unmethylation  | 1.00                                  | 1.78 (1.54-2.05)        |                  |          |
| Methylation    | 15.18 (8.49-26.05)                    | -                       | -                | -        |
| <i>ADAMTS9</i> |                                       |                         |                  |          |
| Unmethylation  | 1.00                                  | 1.85 (1.56-2.20)        |                  |          |
| Methylation    | 1.94 (1.66-2.72)                      | 2.67 (2.12-3.35)        | 0.74 (0.37-1.47) | 0.39     |
| <i>AOXI</i>    |                                       |                         |                  |          |
| Unmethylation  | 1.00                                  | 1.77 (1.48-2.12)        |                  |          |
| Methylation    | 1.75 (1.52-2.01)                      | 3.25 (2.59-4.07)        | 1.05 (0.54-2.02) | 0.88     |
| <i>RERG</i>    |                                       |                         |                  |          |
| Unmethylation  | 1.00                                  | 1.98 (1.67-2.34)        |                  |          |
| Methylation    | 2.27 (1.96-2.63)                      | 3.57 (2.78-4.58)        | 0.79 (0.39-1.60) | 0.52     |
| <i>RARB2</i>   |                                       |                         |                  |          |
| Unmethylation  | 1.00                                  | 1.93 (1.64-2.26)        |                  |          |
| Methylation    | 1.08 (0.92-1.27)                      | 1.31 (1.01-1.71)        | 0.63 (0.30-1.32) | 0.22     |
| MCSM           |                                       |                         |                  |          |
| Unmethylation  | 1.00                                  | 2.11 (1.64-2.72)        |                  |          |
| Methylation    | 1.60 (1.37-1.88)                      | 2.84 (2.32-3.47)        | 0.84 (0.42-1.68) | 0.62     |

<sup>a</sup> Adjusted for age, BMI, occupation and family history of cancer

**Table S12 Effects of combination and interaction between sausages intake and methylation of genes, MCSM on the risk of CRC**

|                | Sausages                              |                   |                         | <i>P</i> |
|----------------|---------------------------------------|-------------------|-------------------------|----------|
|                | <1 Times/Month                        | ≥1 Times/Month    | Interaction             |          |
|                | OR <sub>eg</sub> <sup>1</sup> (95%CI) |                   | OR <sub>i</sub> (95%CI) |          |
| <i>FOXE-1</i>  |                                       |                   |                         |          |
| Unmethylation  | 1.00                                  | 2.61 (2.17-3.13)  |                         |          |
| Methylation    | 1.18 (1.01-1.38)                      | 9.62 (6.36-14.56) | 3.18 (0.88-11.45)       | 0.08     |
| <i>IRF4</i>    |                                       |                   |                         |          |
| Unmethylation  | 1.00                                  | 3.24 (2.73-3.84)  |                         |          |
| Methylation    | 15.54 (9.03-26.72)                    | -                 | -                       | -        |
| <i>ADAMTS9</i> |                                       |                   |                         |          |
| Unmethylation  | 1.00                                  | 3.38 (2.78-4.12)  |                         |          |
| Methylation    | 1.89 (1.63-2.19)                      | 5.12 (3.84-6.82)  | 0.80 (0.23-2.84)        | 0.72     |
| <i>AOXI</i>    |                                       |                   |                         |          |
| Unmethylation  | 1.00                                  | 3.91 (3.12-4.90)  |                         |          |
| Methylation    | 1.81 (1.57-2.08)                      | 4.23 (3.35-5.35)  | 0.59 (0.25-1.39)        | 0.22     |
| <i>RERG</i>    |                                       |                   |                         |          |
| Unmethylation  | 1.00                                  | 3.89 (3.17-4.78)  |                         |          |
| Methylation    | 2.28 (1.97-2.63)                      | 4.74 (3.66-6.16)  | 0.54 (0.22-1.29)        | 0.16     |
| <i>RARB2</i>   |                                       |                   |                         |          |
| Unmethylation  | 1.00                                  | 3.37 (2.79-4.08)  |                         |          |
| Methylation    | 0.995 (0.85-1.16)                     | 2.71 (1.99-3.68)  | 0.80 (0.29-2.26)        | 0.67     |
| MCSM           |                                       |                   |                         |          |
| Unmethylation  | 1.00                                  | 5.53 (4.08-7.49)  |                         |          |
| Methylation    | 1.75 (1.50-2.05)                      | 4.47 (3.59-5.58)  | 0.46 (0.18-1.15)        | 0.10     |

<sup>a</sup> Adjusted for age, BMI, occupation and family history of cancer

**Table S13 Effects of combination and interaction between pungent food intake and methylation of genes, MCSM on the risk of CRC**

|                | Pungent food                          |                   | Interaction             | <i>P</i> |
|----------------|---------------------------------------|-------------------|-------------------------|----------|
|                | <4 Times/Week                         | ≥4 Times/Week     |                         |          |
|                | OR <sub>eg</sub> <sup>1</sup> (95%CI) |                   | OR <sub>i</sub> (95%CI) |          |
| <i>FOXE-1</i>  |                                       |                   |                         |          |
| Unmethylation  | 1.00                                  | 0.74 (0.65-0.86)  |                         |          |
| Methylation    | 1.23 (1.02-1.48)                      | 1.10 (0.90-1.36)  | 1.21 (0.64-2.28)        | 0.56     |
| <i>IRF4</i>    |                                       |                   |                         |          |
| Unmethylation  | 1.00                                  | 0.75 (0.67-0.85)  |                         |          |
| Methylation    | 26.74 (10.85-65.94)                   | 8.99 (4.60-17.57) | 0.45 (0.04-5.54)        | 0.53     |
| <i>ADAMTS9</i> |                                       |                   |                         |          |
| Unmethylation  | 1.00                                  | 0.77 (0.67-0.89)  |                         |          |
| Methylation    | 1.74 (1.46-2.08)                      | 1.47 (1.21-1.79)  | 1.10 (0.60-2.02)        | 0.76     |
| <i>AOXI</i>    |                                       |                   |                         |          |
| Unmethylation  | 1.00                                  | 0.73 (0.62-0.86)  |                         |          |
| Methylation    | 1.59 (1.34-1.88)                      | 1.36 (1.14-1.63)  | 1.17 (0.68-2.03)        | 0.57     |
| <i>RERG</i>    |                                       |                   |                         |          |
| Unmethylation  | 1.00                                  | 0.84 (0.72-0.97)  |                         |          |
| Methylation    | 2.28 (1.91-2.73)                      | 1.55 (1.29-1.86)  | 0.81 (0.45-1.45)        | 0.48     |
| <i>RARB2</i>   |                                       |                   |                         |          |
| Unmethylation  | 1.00                                  | 0.90 (0.78-1.03)  |                         |          |
| Methylation    | 1.30 (1.08-1.58)                      | 0.61 (0.50-0.75)  | 0.52 (0.28-0.99)        | 0.047    |
| MCSM           |                                       |                   |                         |          |
| Unmethylation  | 1.00                                  | 0.68 (0.55-0.85)  |                         |          |
| Methylation    | 1.38 (1.15-1.67)                      | 1.12 (0.93-1.35)  | 1.18 (0.65-2.16)        | 0.58     |

<sup>a</sup> Adjusted for age, BMI, occupation and family history of cancer

**Table S14 Effects of combination and interaction between sauerkraut intake and methylation of genes, MCSM on the risk of CRC**

|                | Sauerkraut                            |                    | Interaction             | <i>P</i> |
|----------------|---------------------------------------|--------------------|-------------------------|----------|
|                | <3 Times/Week                         | ≥3 Times/Week      |                         |          |
|                | OR <sub>eg</sub> <sup>1</sup> (95%CI) |                    | OR <sub>i</sub> (95%CI) |          |
| <i>FOXE-1</i>  |                                       |                    |                         |          |
| Unmethylation  | 1.00                                  | 0.67 (0.58-0.78)   |                         |          |
| Methylation    | 1.74 (1.37-2.21)                      | 0.80 (0.66-0.97)   | 0.68 (0.35-1.34)        | 0.27     |
| <i>IRF4</i>    |                                       |                    |                         |          |
| Unmethylation  | 1.00                                  | 0.58 (0.51-0.65)   |                         |          |
| Methylation    | 13.41 (5.35-33.62)                    | 11.12 (5.77-21.44) | 1.44 (0.12-18.05)       | 0.78     |
| <i>ADAMTS9</i> |                                       |                    |                         |          |
| Unmethylation  | 1.00                                  | 0.66 (0.56-0.76)   |                         |          |
| Methylation    | 2.09 (1.68-2.61)                      | 1.09 (0.91-1.32)   | 0.80 (0.43-1.49)        | 0.48     |
| <i>AOXI</i>    |                                       |                    |                         |          |
| Unmethylation  | 1.00                                  | 0.67 (0.57-0.80)   |                         |          |
| Methylation    | 1.98 (1.61-2.43)                      | 1.07 (0.90-1.28)   | 0.81 (0.45-1.43)        | 0.46     |
| <i>RERG</i>    |                                       |                    |                         |          |
| Unmethylation  | 1.00                                  | 0.67 (0.57-0.78)   |                         |          |
| Methylation    | 2.46 (1.98-3.06)                      | 1.27 (1.06-1.52)   | 0.77 (0.42-1.42)        | 0.40     |
| <i>RARB2</i>   |                                       |                    |                         |          |
| Unmethylation  | 1.00                                  | 0.55 (0.48-0.64)   |                         |          |
| Methylation    | 0.76 (0.61-0.95)                      | 0.60 (0.49-0.72)   | 1.41 (0.74-2.70)        | 0.30     |
| MCSM           |                                       |                    |                         |          |
| Unmethylation  | 1.00                                  | 0.65 (0.52-0.82)   |                         |          |
| Methylation    | 1.59 (1.28-1.98)                      | 0.97 (0.79-1.18)   | 0.93 (0.50-1.73)        | 0.82     |

<sup>a</sup> Adjusted for age, BMI, occupation and family history of cancer

**Table S15 Effects of combination and interaction between overnight food intake and methylation of genes, MCSM on the risk of CRC**

|                | Overnight food                        |                   |                         | <i>P</i> |
|----------------|---------------------------------------|-------------------|-------------------------|----------|
|                | <3 Times/Week                         | ≥3 Times/Week     | Interaction             |          |
|                | OR <sub>eg</sub> <sup>1</sup> (95%CI) |                   | OR <sub>i</sub> (95%CI) |          |
| <i>FOXE-1</i>  |                                       |                   |                         |          |
| Unmethylation  | 1.00                                  | 1.55 (1.35-1.79)  |                         |          |
| Methylation    | 1.30 (1.09-1.55)                      | 2.48 (1.97-3.12)  | 1.23 (0.64-2.36)        | 0.54     |
| <i>IRF4</i>    |                                       |                   |                         |          |
| Unmethylation  | 1.00                                  | 1.80 (1.58-2.04)  |                         |          |
| Methylation    | 44.89 (18.28-110.28)                  | 9.60 (4.83-19.10) | 0.12 (0.01-1.50)        | 0.10     |
| <i>ADAMTS9</i> |                                       |                   |                         |          |
| Unmethylation  | 1.00                                  | 1.64 (1.41-1.90)  |                         |          |
| Methylation    | 1.83 (1.54-2.17)                      | 3.00 (2.45-3.68)  | 1.01 (0.54-1.85)        | 0.99     |
| <i>AOXI</i>    |                                       |                   |                         |          |
| Unmethylation  | 1.00                                  | 1.65 (1.40-1.95)  |                         |          |
| Methylation    | 1.72 (1.47-2.02)                      | 3.04 (2.51-3.68)  | 1.07 (0.61-1.88)        | 0.82     |
| <i>RERG</i>    |                                       |                   |                         |          |
| Unmethylation  | 1.00                                  | 1.74 (1.49-2.03)  |                         |          |
| Methylation    | 2.17 (1.84-2.56)                      | 3.32 (2.74-4.04)  | 0.88 (0.48-1.60)        | 0.68     |
| <i>RARB2</i>   |                                       |                   |                         |          |
| Unmethylation  | 1.00                                  | 1.98 (1.71-2.29)  |                         |          |
| Methylation    | 1.29 (1.08-1.53)                      | 1.22 (0.97-1.53)  | 0.48 (0.25-0.93)        | 0.03     |
| MCSM           |                                       |                   |                         |          |
| Unmethylation  | 1.00                                  | 1.17 (0.93-1.48)  |                         |          |
| Methylation    | 1.24 (1.04-1.47)                      | 2.48 (2.05-3.01)  | 1.71 (0.92-3.18)        | 0.09     |

<sup>a</sup> Adjusted for age, BMI, occupation and family history of cancer

**Table S16 Effects of combination and interaction between smoking and methylation of genes, MCSM on the risk of CRC**

|                | Smoking                               |                  |                         | <i>P</i> |
|----------------|---------------------------------------|------------------|-------------------------|----------|
|                | No                                    | Yes              | Interaction             |          |
|                | OR <sub>eg</sub> <sup>1</sup> (95%CI) |                  | OR <sub>i</sub> (95%CI) |          |
| <i>FOXE-1</i>  |                                       |                  |                         |          |
| Unmethylation  | 1.00                                  | 1.42 (1.12-1.81) |                         |          |
| Methylation    | 0.92 (0.77-1.11)                      | 0.79 (0.65-0.96) | 1.66 (0.89-3.11)        | 0.11     |
| <i>IRF4</i>    |                                       |                  |                         |          |
| Unmethylation  | 1.00                                  | -                |                         |          |
| Methylation    | 0.11 (0.06-0.19)                      | 0.11 (0.06-0.19) | -                       | -        |
| <i>ADAMTS9</i> |                                       |                  |                         |          |
| Unmethylation  | 1.00                                  | 0.88 (0.71-1.11) |                         |          |
| Methylation    | 0.52 (0.43-0.62)                      | 0.51 (0.42-0.62) | 0.89 (0.49-1.63)        | 0.71     |
| <i>AOXI</i>    |                                       |                  |                         |          |
| Unmethylation  | 1.00                                  | 1.19 (0.99-1.44) |                         |          |
| Methylation    | 0.66 (0.56-0.78)                      | 0.58 (0.49-0.69) | 1.35 (0.77-2.37)        | 0.29     |
| <i>RERG</i>    |                                       |                  |                         |          |
| Unmethylation  | 1.00                                  | 1.49 (1.21-1.85) |                         |          |
| Methylation    | 0.62 (0.53-0.74)                      | 0.51 (0.42-0.60) | 1.84 (1.02-3.31)        | 0.04     |
| <i>RARB2</i>   |                                       |                  |                         |          |
| Unmethylation  | 1.00                                  | 0.64 (0.50-0.81) |                         |          |
| Methylation    | 0.81 (0.68-0.98)                      | 0.92 (0.76-1.11) | 0.56 (0.30-1.06)        | 0.07     |
| MCSM           |                                       |                  |                         |          |
| Unmethylation  | 1.00                                  | 0.78 (0.62-0.97) |                         |          |
| Methylation    | 1.28 (1.07-1.53)                      | 1.44 (1.20-1.73) | 1.45 (0.79-2.66)        | 0.23     |

<sup>a</sup> Adjusted for age, BMI, occupation and family history of cancer

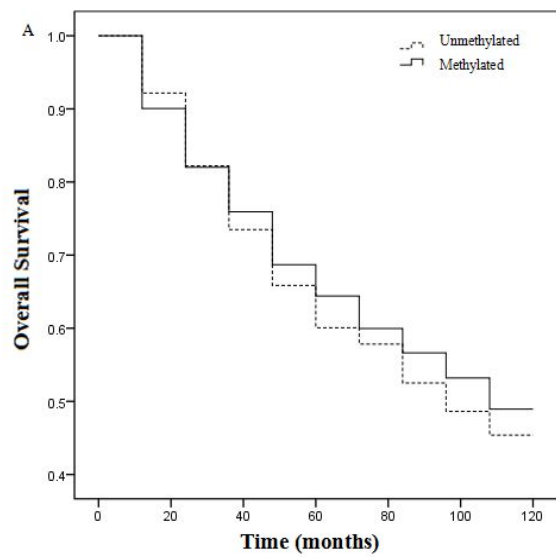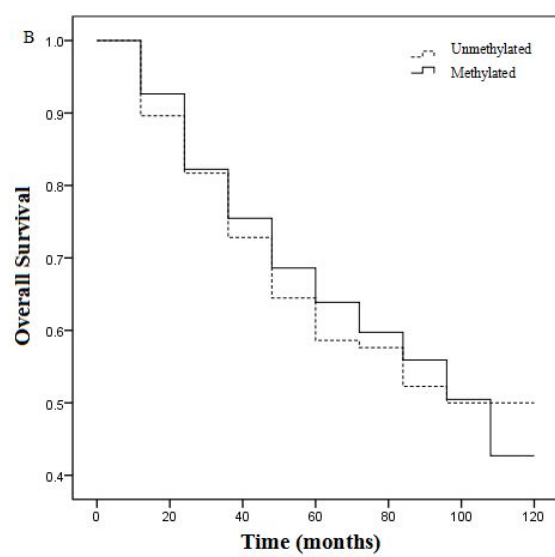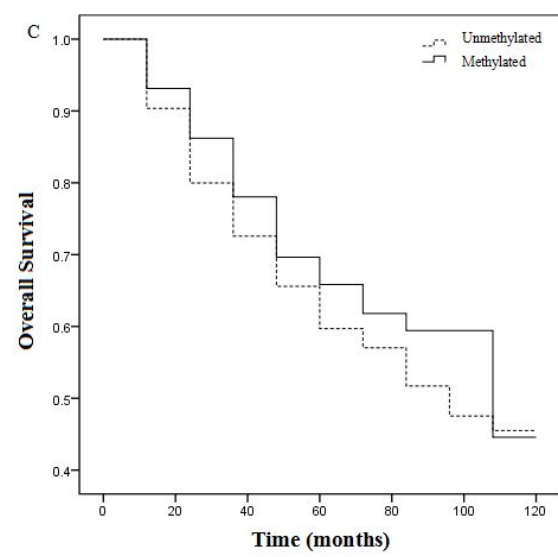

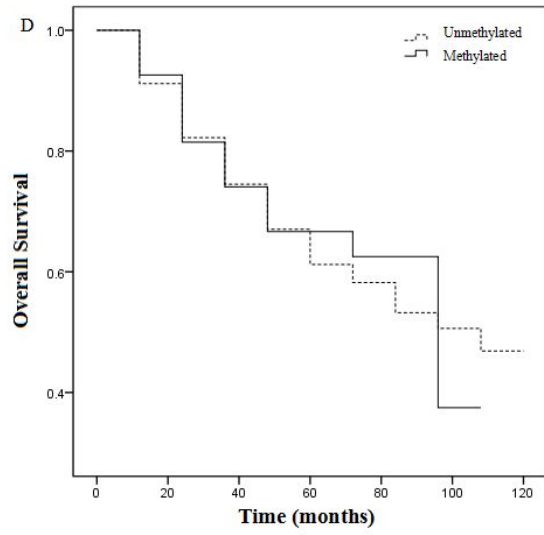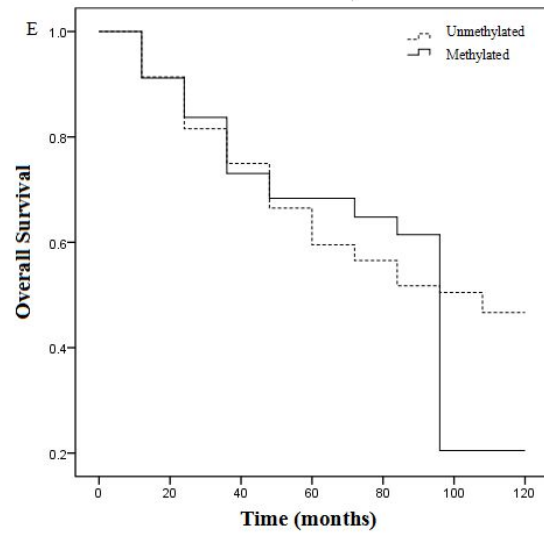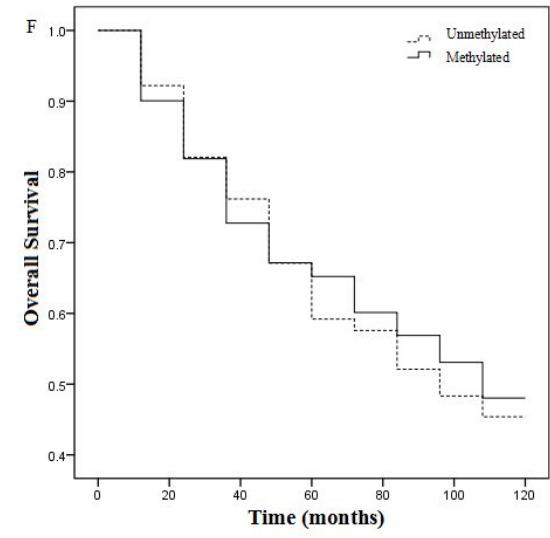



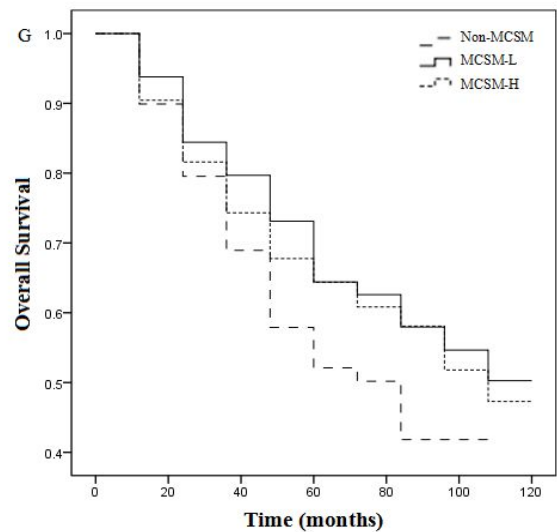

**Figure S1 A-G Kaplan-Meier curves for cumulative survival comparisons between patients with unmethylated and methylated of ADAMST9, AOX-1, FOXE-1, IRF4, RARB2, RERG and MCSM, respectively**
